# Supplementary material for: Bifidobacteria Exhibit LuxS-Dependent Autoinducer 2 Activity and Biofilm Formation
Source: PubMed Central journal article supplement (PMC3914940; doi:10.1371/journal.pone.0088260), 2014-02-05

1 **Figure S2:** Phylogenetic tree calculated with the amino acid sequences of the bifidobacterial LuxS homologues shown in Table S2.

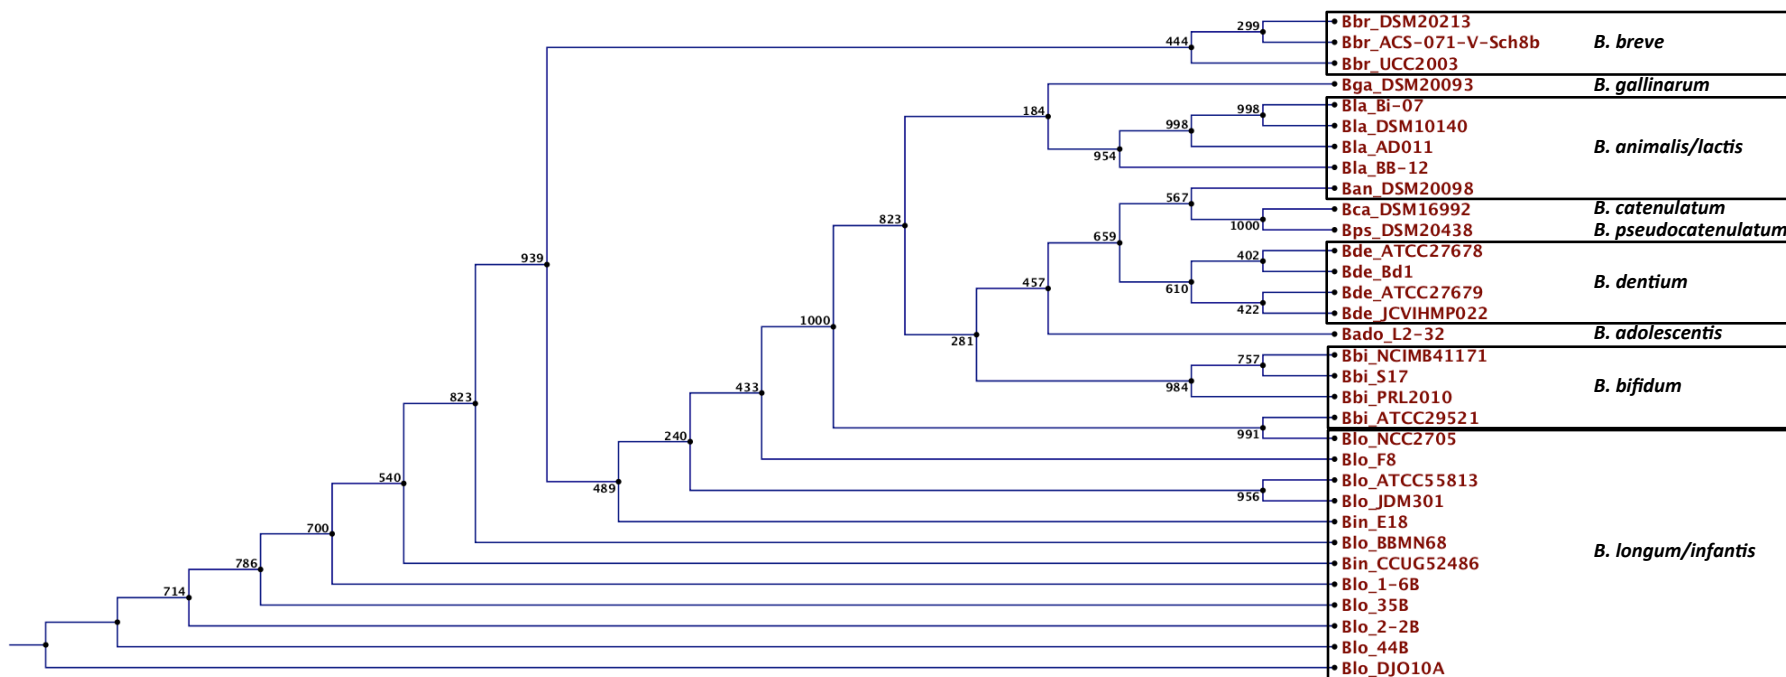

Supplement: pone.0088260.s001.pdf [file pone.0088260.s001.pdf]
