# Supplementary material for: Bifidobacteria Exhibit LuxS-Dependent Autoinducer 2 Activity and Biofilm Formation
Source: PubMed Central journal article supplement (PMC3914940; doi:10.1371/journal.pone.0088260), 2014-02-05
Supplement: pone.0088260.s002.pdf [file pone.0088260.s002.pdf]

- 1 **Figure S3:** Biomass ( $OD_{600}$ ) and pH of *B. longum* NCC2705, *B. longum* E18 and *B. bifidum*  
2 S17 during growth on MRSc medium under anaerobic conditions at 37 °C

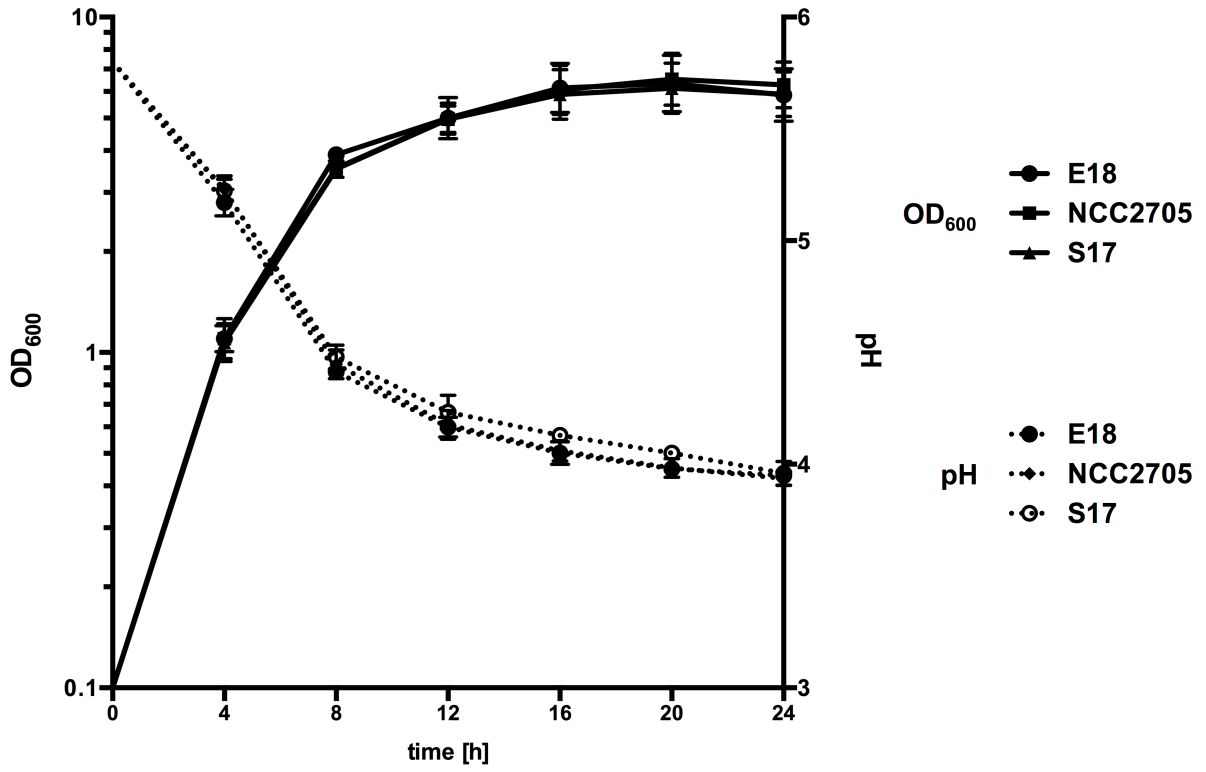

3
