# Supplementary material for: Bifidobacteria Exhibit LuxS-Dependent Autoinducer 2 Activity and Biofilm Formation
Source: PubMed Central journal article supplement (PMC3914940; doi:10.1371/journal.pone.0088260), 2014-02-05
Supplement: pone.0088260.s003.pdf [file pone.0088260.s003.pdf]

## 1 Supplementary files

2 **Table S1:** Bifidobacterial LuxS homologues of found in publically available genome  
3 databases with their corresponding locus tag and GI number.

| <b>Strain</b>                                      | <b>Locus tag</b> | <b>GI No.</b> |
|----------------------------------------------------|------------------|---------------|
| <i>B. adolescentis</i> L2-32                       | BIFADO_00782     | 154084812     |
| <i>B. angulatum</i> DSM 20098 (= JCM 7096)         | BIFANG_03320     | 229784636     |
| <i>B. animalis</i> subsp. <i>lactis</i> AD011      | BLA_1115         | 219621246     |
| <i>B. animalis</i> subsp. <i>lactis</i> BB-12      | BIF_01888        | 384190872     |
| <i>B. animalis</i> subsp. <i>lactis</i> Bi-07      | W91_0606         | 386654775     |
| <i>B. animalis</i> subsp. <i>lactis</i> DSM 10140  | Balat_0582       | 240250585     |
| <i>B. breve</i> UCC2003                            | Bbr_0541         | 476417675     |
| <i>B. bifidum</i> PRL2010                          | BBPR_1341        | 310867022     |
| <i>B. bifidum</i> ATCC 29521 (= JCM 1255)          | unassigned       | 117574395     |
| <i>B. bifidum</i> NCIMB 41171                      | BBNG_01295       | 313133130     |
| <i>B. bifidum</i> S17                              | BBIF_1299        | 310287820     |
| <i>B. breve</i> ACS-071-V-Sch8b                    | HMPREF9228_1355  | 333109577     |
| <i>B. breve</i> DSM 20213 = JCM 1192               | BIFBRE_03448     | 291381520     |
| <i>B. dentium</i> ATCC 27678                       | BIFDEN_00080     | 171276628     |
| <i>B. dentium</i> ATCC 27679                       | HMPREF0168_1301  | 304553073     |
| <i>B. dentium</i> JCVIHMP022                       | HMPREF9003_0698  | 308220660     |
| <i>B. dentium</i> Bd1                              | BDP_0675         | 283102232     |
| <i>B. catenulatum</i> DSM 16992 (= JCM 1194)       | BIFCAT_01757     | 212660103     |
| <i>B. pseudocatenulatum</i> DSM 20438 (= JCM 1200) | BIFPSEUDO_02401  | 225158283     |
| <i>B. gallicum</i> DSM 20093                       | BIFGAL_03594     | 270276714     |
| <i>B. longum</i> subsp. <i>infantis</i> CCUG 52486 | BLIG_00145       | 239514329     |
| <i>B. longum</i> subsp. <i>longum</i> ATCC 55813   | HMPREF0175_0753  | 227213310     |
| <i>B. longum</i> subsp. <i>longum</i> BBMN68       | unassigned       | 312133179     |
| <i>B. longum</i> DJO10A                            | BLD_0910         | 189428208     |
| <i>B. longum</i> subsp. <i>longum</i> 44B          | HMPREF1312_0146  | 386417703     |
| <i>B. longum</i> subsp. <i>longum</i> 2-2B         | HMPREF1315_1080  | 386411300     |
| <i>B. longum</i> subsp. <i>longum</i> 35B          | HMPREF1314_1056  | 386408262     |
| <i>B. longum</i> subsp. <i>longum</i> 1-6B         | HMPREF1313_0335  | 386407207     |
| <i>B. longum</i> NCC2705                           | BL1152           | 23326400      |
| <i>B. longum</i> subsp. <i>longum</i> F8           | BIL_13850        | 479136053     |
